# Supplementary material for: Development of Fluorinated Non-Peptidic Ghrelin Receptor Ligands for Potential Use in Molecular Imaging
Source: MDPI journal article supplement (doi:10.3390/ijms18040768), 2017-04-05
Supplement: s1 [file s1]

Article

# Development of Fluorinated Non-Peptidic Ghrelin Receptor Ligands for Potential Use in Molecular Imaging

Rareș-Petru Moldovan, Sylvia Els-Heindl, Dennis J. Worm, Torsten Kniess, Michael Kluge, Annette G. Beck-Sickinger, Winnie Deuther-Conrad, Ute Krügel, and Peter Brust

Supplementary Materials

Antagonistic properties at the hGhrR

Molecules with the highest affinity in the binding assay were additionally tested for their antagonistic potency in an inositol phosphate accumulation assay [1] (Table S1). The receptor was first pre-stimulated with different concentrations of the compounds for 5 min and then  $10^{-8}$  M ghrelin was added.

**Table S1.** Inositol phosphate accumulation assay to determine antagonistic potencies of candidate molecules with  $10^{-8}$  M ghrelin.

| Compound | IC <sub>50</sub> (nM) | pIC <sub>50</sub> <sup>1</sup> | E <sub>max</sub> <sup>1</sup> (%) | n <sup>2</sup> |
|----------|-----------------------|--------------------------------|-----------------------------------|----------------|
| (S)-9    | 24.8                  | 7.61 ± 0.20                    | 38 ± 4                            | ≥ 3            |
| (R)-9    | 17.5                  | 7.76 ± 0.24                    | 45 ± 5                            | 4              |
| (S)-10   | 345                   | 6.46 ± 0.48                    | 22 ± 4                            | ≥ 3            |
| (S)-11   | 349                   | 6.46 ± 0.29                    | 56 ± 10                           | 4              |
| (S)-13   | 207                   | 6.69 ± 0.29                    | 31 ± 5                            | 5              |
| (S)-14   | 123                   | 6.91 ± 0.18                    | 57 ± 6                            | 4              |
| (S)-16   | 28.7                  | 7.54 ± 0.15                    | 65 ± 5                            | 5              |

<sup>1</sup> Mean values ± SEM, <sup>2</sup> number of independent experiments in duplicates

Ghrelin was used as control with an EC<sub>50</sub> of 0.9 nM (pEC<sub>50</sub> = 9.05 ± 0.06, E<sub>max</sub> = 100 ± 3%). Due to the partial agonism of the compounds, the effect of ghrelin cannot be completely antagonized. The assay provided IC<sub>50</sub> values for (R)-9 and (S)-16 of 17.5 nM and 28.7 nM, respectively, which were similar to the antagonistic potency of the starting molecule (S)-9 of 24.8 nM. (S)-10, (S)-11, (S)-14, and (S)-13 were much less potent, as indicated by their IC<sub>50</sub> values (Table S1). The highest antagonistic efficacy could be observed for (S)-16 (E<sub>max</sub> of 65 %).

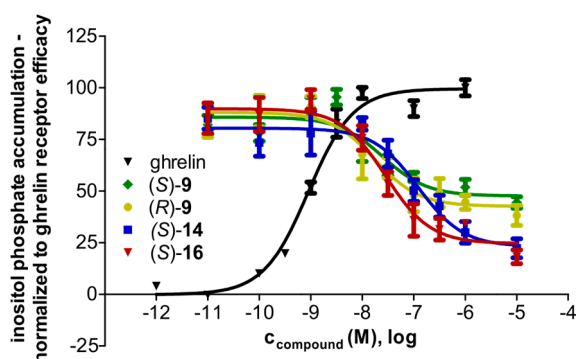

**Figure S1.** Antagonistic properties of the non-peptidic candidate compounds (S)-9, (R)-9, (S)-14, and (S)-16. Compounds were analyzed by inositol phosphate accumulation in COS7 cells stably transfected with hGhrR. Data were normalized to ghrelin (100% = maximal efficacy, 0% = constitutive receptor activity) and given in percent as means ± SEM of ≥ 3 independent experiments performed in duplicates.

*Selectivity Studies***Table S2.** Results of (S)-9 screening by Eurofins Panlabs; for details on the methods see [www.eurofinspanlabs.com](http://www.eurofinspanlabs.com).

| <b>Cat #</b> | <b>Assay Name</b>                                                                 | <b>Batch*</b> | <b>Spec.</b> | <b>Rep.</b> | <b>Conc.</b> | <b>% Inh.</b> |
|--------------|-----------------------------------------------------------------------------------|---------------|--------------|-------------|--------------|---------------|
| 203100       | Adrenergic $\alpha_{1A}$                                                          | 395123        | rat          | 2           | 1 $\mu$ M    | -3            |
| 203200       | Adrenergic $\alpha_{1B}$                                                          | 395160        | rat          | 2           | 1 $\mu$ M    | 9             |
| 244530       | Chemokine CXCR3                                                                   | 395320        | hum          | 2           | 1 $\mu$ M    | 0             |
| 252610       | Muscarinic M <sub>1</sub>                                                         | 395145        | hum          | 2           | 1 $\mu$ M    | 14            |
| 252710       | Muscarinic M <sub>2</sub>                                                         | 395239        | hum          | 2           | 1 $\mu$ M    | 11            |
| 265910       | Potassium Channel hERG, [ <sup>3</sup> H]Dofetilide                               | 395705        | hum          | 2           | 1 $\mu$ M    | 35            |
| 271710       | Serotonin (5-Hydroxytryptamine) 5-HT <sub>2B</sub> , [ <sup>3</sup> H]Mesulergine | 395157        | hum          | 2           | 1 $\mu$ M    | 4             |

1. Kostelnik, K.B.; Els-Heindl, S.; Kloting, N.; Baumann, S.; von Bergen, M.; Beck-Sickinger, A.G. High metabolic in vivo stability and bioavailability of a palmitoylated ghrelin receptor ligand assessed by mass spectrometry. *Bioorg. Med. Chem.* **2015**, *23*, 3925-3932.
